# Supplementary material for: Controlling the Morphology of Tellurene for a High-Performance H2S Chemiresistive Room-Temperature Gas Sensor
Source: MDPI journal article supplement (doi:10.3390/nano13192707), 2023-10-05
Supplement: s1 [file s1]

## *Supplementary Materials*

# Controlling Morphology of Tellurene for a High- Performance H<sub>2</sub>S Chemiresistive Room- Temperature Gas

Yeonjin Je<sup>1,2</sup> and Sang-Soo Chee<sup>1,\*</sup>

<sup>1</sup>Nano Convergence Materials Center, Korea Institute of Ceramic Engineering and Technology (KICET), Jinju, 52851, Republic of Korea

<sup>2</sup>Department of Materials Science and Engineering, Korea University, Seoul, 02841, Republic of Korea

\*Correspondence: sschee@kicet.re.kr (S.S.C.)

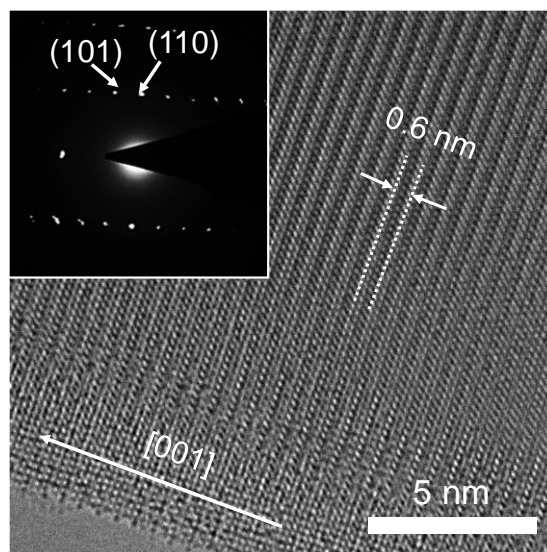

**Figure S1.** High-resolution TEM image of the obtained tellurene using PVP with a molecular weight of 360k g/mol. Inset image indicates SAED pattern of tellurene.

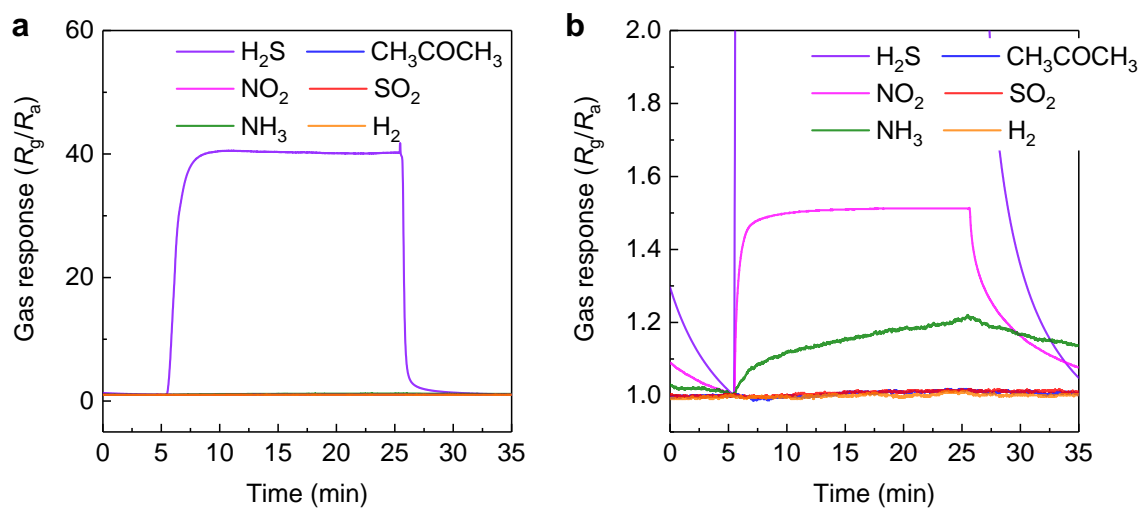

**Figure S2.** (a) Gas-sensing characterizations of the 1D Te sensor under exposure to  $H_2S$ ,  $NO_2$ ,  $NH_3$ ,  $CH_3COCH_3$ ,  $SO_2$ , and  $H_2$ . (b) Enlarged plot of gas sensing characterization of the 1D Te sensor under exposure to to 100 ppm of  $H_2S$ ,  $NO_2$ ,  $NH_3$ ,  $CH_3COCH_3$ ,  $SO_2$ , and  $H_2$ .

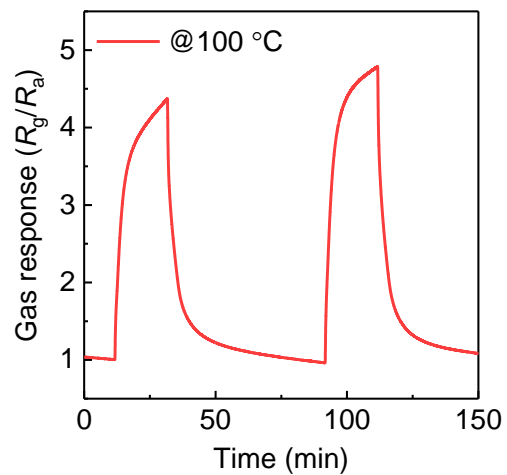

**Figure S3.** Dynamic gas sensing characterizations of 1D Te-based sensors under exposure to 100 ppm H<sub>2</sub>S. Operating temperature is 100 °C.

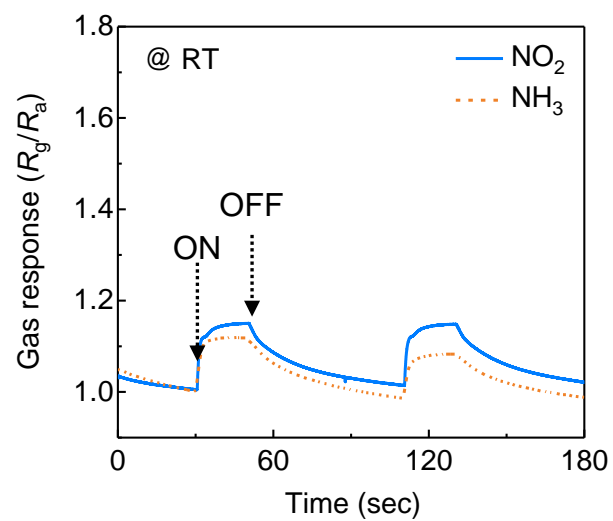

Figure S4. Dynamic gas sensing characterizations of 2D Te-based sensor under exposure to 100 ppm  $\text{NO}_2$  and  $\text{NH}_3$ .
